# Supplementary material
Source: Springer Nature journal article supplement (https://www.springermedizin.de/resource/supplementary/12916_2012_742_MOESM1_ESM.pdf/9598664)

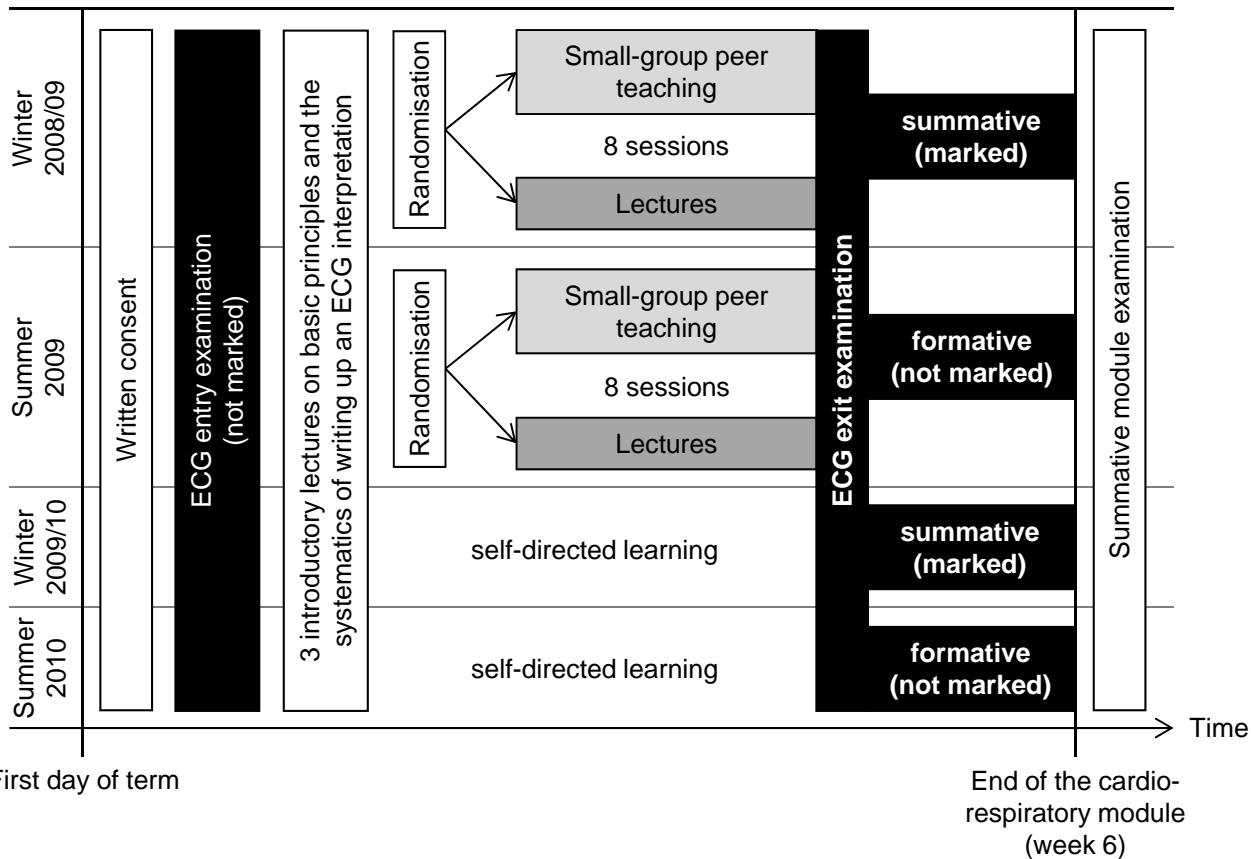

First day of term

End of the cardio-respiratory module (week 6)

Supplement: MOESM1 [file 9598664]
